# Supplementary material
Source: publisher site journal article supplement (https://www.jstage.jst.go.jp/article/geochemj/49/5/49_2.0385/_supplement/_download/49_2.0385_1.pdf)
Supplement: Supplementary file 1 [file 49_2.0385_1.pdf]

Table S1. Ion intensities and the calculated He concentrations of Fig. 4.

| 2014/3/11  |        | Relative sensitivity factor of the day = <b>2.57E+16</b> |       |      |            |                |          |               |
|------------|--------|----------------------------------------------------------|-------|------|------------|----------------|----------|---------------|
| Depth (nm) | He     | C+                                                       | C2+   | C3+  | $\Sigma C$ | He/ $\Sigma C$ | He/bin   | He conc /cm-3 |
| 1.82       | 0.0042 | 13.44                                                    | 10.79 | 0.66 | 24.88      | 1.69E-04       | 4.34E+12 | 2.39E+19      |
| 3.63       | 0.0052 | 12.24                                                    | 10.41 | 0.32 | 22.98      | 2.26E-04       | 5.82E+12 | 3.21E+19      |
| 5.45       | 0.0058 | 12.72                                                    | 11.65 | 0.33 | 24.70      | 2.35E-04       | 6.04E+12 | 3.33E+19      |
| 7.27       | 0.0060 | 13.05                                                    | 11.90 | 0.31 | 25.26      | 2.37E-04       | 6.11E+12 | 3.36E+19      |
| 9.08       | 0.0088 | 13.26                                                    | 12.02 | 0.32 | 25.60      | 3.44E-04       | 8.84E+12 | 4.87E+19      |
| 10.90      | 0.0084 | 13.04                                                    | 11.87 | 0.30 | 25.21      | 3.33E-04       | 8.57E+12 | 4.72E+19      |
| 12.72      | 0.0070 | 13.50                                                    | 12.10 | 0.33 | 25.93      | 2.70E-04       | 6.95E+12 | 3.82E+19      |
| 14.53      | 0.0114 | 13.73                                                    | 13.10 | 0.28 | 27.11      | 4.20E-04       | 1.08E+13 | 5.96E+19      |
| 16.35      | 0.0136 | 14.00                                                    | 12.12 | 0.34 | 26.46      | 5.14E-04       | 1.32E+13 | 7.28E+19      |
| 18.17      | 0.0170 | 14.41                                                    | 12.33 | 0.37 | 27.11      | 6.27E-04       | 1.61E+13 | 8.88E+19      |
| 19.98      | 0.0138 | 14.18                                                    | 11.85 | 0.33 | 26.36      | 5.24E-04       | 1.35E+13 | 7.41E+19      |
| 21.80      | 0.0218 | 13.74                                                    | 12.54 | 0.33 | 26.61      | 8.19E-04       | 2.11E+13 | 1.16E+20      |
| 23.62      | 0.0220 | 14.39                                                    | 12.54 | 0.39 | 27.32      | 8.05E-04       | 2.07E+13 | 1.14E+20      |
| 25.43      | 0.0274 | 14.47                                                    | 12.59 | 0.33 | 27.38      | 1.00E-03       | 2.57E+13 | 1.42E+20      |
| 27.25      | 0.0260 | 14.21                                                    | 12.38 | 0.30 | 26.88      | 9.67E-04       | 2.49E+13 | 1.37E+20      |
| 29.07      | 0.0306 | 14.03                                                    | 11.00 | 0.36 | 25.39      | 1.21E-03       | 3.10E+13 | 1.71E+20      |
| 30.88      | 0.0298 | 14.24                                                    | 12.36 | 0.31 | 26.92      | 1.11E-03       | 2.85E+13 | 1.57E+20      |
| 32.70      | 0.0366 | 13.89                                                    | 12.01 | 0.31 | 26.21      | 1.40E-03       | 3.59E+13 | 1.98E+20      |
| 34.52      | 0.0388 | 13.71                                                    | 11.97 | 0.31 | 25.99      | 1.49E-03       | 3.84E+13 | 2.11E+20      |
| 36.33      | 0.0444 | 14.17                                                    | 12.18 | 0.32 | 26.67      | 1.66E-03       | 4.28E+13 | 2.36E+20      |
| 38.15      | 0.0560 | 13.94                                                    | 12.13 | 0.28 | 26.35      | 2.13E-03       | 5.47E+13 | 3.01E+20      |
| 39.97      | 0.0556 | 13.86                                                    | 12.02 | 0.35 | 26.23      | 2.12E-03       | 5.45E+13 | 3.00E+20      |
| 41.78      | 0.0608 | 13.72                                                    | 11.94 | 0.29 | 25.94      | 2.34E-03       | 6.03E+13 | 3.32E+20      |
| 43.60      | 0.0696 | 13.81                                                    | 11.61 | 0.35 | 25.77      | 2.70E-03       | 6.95E+13 | 3.82E+20      |
| 45.42      | 0.0760 | 14.17                                                    | 11.80 | 0.37 | 26.35      | 2.88E-03       | 7.42E+13 | 4.08E+20      |
| 47.23      | 0.0928 | 13.69                                                    | 11.76 | 0.29 | 25.75      | 3.60E-03       | 9.27E+13 | 5.10E+20      |
| 49.05      | 0.0950 | 13.86                                                    | 11.43 | 0.33 | 25.62      | 3.71E-03       | 9.54E+13 | 5.25E+20      |
| 50.87      | 0.1142 | 13.96                                                    | 11.42 | 0.34 | 25.71      | 4.44E-03       | 1.14E+14 | 6.29E+20      |
| 52.68      | 0.1110 | 14.37                                                    | 11.80 | 0.33 | 26.51      | 4.19E-03       | 1.08E+14 | 5.93E+20      |
| 54.50      | 0.1236 | 13.80                                                    | 11.63 | 0.30 | 25.72      | 4.81E-03       | 1.24E+14 | 6.81E+20      |
| 56.32      | 0.1326 | 13.46                                                    | 11.67 | 0.30 | 25.44      | 5.21E-03       | 1.34E+14 | 7.38E+20      |
| 58.13      | 0.1566 | 13.90                                                    | 11.52 | 0.32 | 25.74      | 6.08E-03       | 1.57E+14 | 8.62E+20      |
| 59.95      | 0.1652 | 13.62                                                    | 11.99 | 0.32 | 25.92      | 6.37E-03       | 1.64E+14 | 9.02E+20      |
| 61.77      | 0.1822 | 13.21                                                    | 11.91 | 0.27 | 25.39      | 7.18E-03       | 1.85E+14 | 1.02E+21      |
| 63.58      | 0.2150 | 13.70                                                    | 12.26 | 0.30 | 26.26      | 8.19E-03       | 2.11E+14 | 1.16E+21      |
| 65.40      | 0.2216 | 13.58                                                    | 11.86 | 0.31 | 25.74      | 8.61E-03       | 2.21E+14 | 1.22E+21      |
| 67.22      | 0.2386 | 13.54                                                    | 11.86 | 0.31 | 25.71      | 9.28E-03       | 2.39E+14 | 1.31E+21      |
| 69.03      | 0.2684 | 13.54                                                    | 11.62 | 0.29 | 25.45      | 1.05E-02       | 2.71E+14 | 1.49E+21      |
| 70.85      | 0.2904 | 13.86                                                    | 12.02 | 0.29 | 26.17      | 1.11E-02       | 2.86E+14 | 1.57E+21      |
| 72.67      | 0.3030 | 13.96                                                    | 11.88 | 0.34 | 26.17      | 1.16E-02       | 2.98E+14 | 1.64E+21      |
| 74.48      | 0.3208 | 13.67                                                    | 11.80 | 0.26 | 25.73      | 1.25E-02       | 3.21E+14 | 1.77E+21      |
| 76.30      | 0.3310 | 13.96                                                    | 11.84 | 0.28 | 26.09      | 1.27E-02       | 3.26E+14 | 1.80E+21      |
| 78.12      | 0.3930 | 14.23                                                    | 11.25 | 0.39 | 25.86      | 1.52E-02       | 3.91E+14 | 2.15E+21      |
| 79.93      | 0.3958 | 13.99                                                    | 11.29 | 0.36 | 25.64      | 1.54E-02       | 3.97E+14 | 2.19E+21      |
| 81.75      | 0.4118 | 13.90                                                    | 11.76 | 0.33 | 25.99      | 1.58E-02       | 4.08E+14 | 2.24E+21      |
| 83.57      | 0.4022 | 13.63                                                    | 11.74 | 0.28 | 25.65      | 1.57E-02       | 4.03E+14 | 2.22E+21      |
| 85.38      | 0.4160 | 13.36                                                    | 11.50 | 0.30 | 25.16      | 1.65E-02       | 4.25E+14 | 2.34E+21      |
| 87.20      | 0.4184 | 13.70                                                    | 11.85 | 0.31 | 25.86      | 1.62E-02       | 4.16E+14 | 2.29E+21      |

|        |        |       |       |      |       |          |          |          |
|--------|--------|-------|-------|------|-------|----------|----------|----------|
| 89.02  | 0.3988 | 13.35 | 11.82 | 0.31 | 25.47 | 1.57E-02 | 4.03E+14 | 2.22E+21 |
| 90.83  | 0.3780 | 13.41 | 12.51 | 0.26 | 26.18 | 1.44E-02 | 3.71E+14 | 2.04E+21 |
| 92.65  | 0.3684 | 13.36 | 11.64 | 0.28 | 25.27 | 1.46E-02 | 3.75E+14 | 2.06E+21 |
| 94.47  | 0.3568 | 13.70 | 11.27 | 0.35 | 25.32 | 1.41E-02 | 3.63E+14 | 2.00E+21 |
| 96.28  | 0.3204 | 13.49 | 11.41 | 0.30 | 25.20 | 1.27E-02 | 3.27E+14 | 1.80E+21 |
| 98.10  | 0.2822 | 13.63 | 12.36 | 0.25 | 26.24 | 1.08E-02 | 2.77E+14 | 1.52E+21 |
| 99.92  | 0.2578 | 13.55 | 11.56 | 0.29 | 25.40 | 1.02E-02 | 2.61E+14 | 1.44E+21 |
| 101.73 | 0.2194 | 13.67 | 11.38 | 0.28 | 25.32 | 8.67E-03 | 2.23E+14 | 1.23E+21 |
| 103.55 | 0.1816 | 13.46 | 11.10 | 0.31 | 24.87 | 7.30E-03 | 1.88E+14 | 1.03E+21 |
| 105.37 | 0.1488 | 13.35 | 11.73 | 0.28 | 25.37 | 5.87E-03 | 1.51E+14 | 8.31E+20 |
| 107.18 | 0.1166 | 12.99 | 11.29 | 0.27 | 24.55 | 4.75E-03 | 1.22E+14 | 6.73E+20 |
| 109.00 | 0.1044 | 12.65 | 10.76 | 0.33 | 23.74 | 4.40E-03 | 1.13E+14 | 6.23E+20 |
| 110.82 | 0.0752 | 12.80 | 12.21 | 0.27 | 25.29 | 2.97E-03 | 7.65E+13 | 4.21E+20 |
| 112.63 | 0.0630 | 12.42 | 11.27 | 0.26 | 23.95 | 2.63E-03 | 6.77E+13 | 3.72E+20 |
| 114.45 | 0.0512 | 12.55 | 11.11 | 0.31 | 23.97 | 2.14E-03 | 5.50E+13 | 3.02E+20 |
| 116.27 | 0.0340 | 12.05 | 11.52 | 0.25 | 23.82 | 1.43E-03 | 3.67E+13 | 2.02E+20 |
| 118.08 | 0.0268 | 12.14 | 12.07 | 0.24 | 24.45 | 1.10E-03 | 2.82E+13 | 1.55E+20 |
| 119.90 | 0.0188 | 12.24 | 11.24 | 0.27 | 23.75 | 7.92E-04 | 2.04E+13 | 1.12E+20 |
| 121.72 | 0.0178 | 12.09 | 11.51 | 0.23 | 23.82 | 7.47E-04 | 1.92E+13 | 1.06E+20 |
| 123.53 | 0.0142 | 12.28 | 10.85 | 0.28 | 23.41 | 6.06E-04 | 1.56E+13 | 8.59E+19 |
| 125.35 | 0.0098 | 12.39 | 11.07 | 0.26 | 23.72 | 4.13E-04 | 1.06E+13 | 5.85E+19 |
| 127.17 | 0.0086 | 12.27 | 10.69 | 0.27 | 23.23 | 3.70E-04 | 9.52E+12 | 5.24E+19 |
| 128.98 | 0.0070 | 12.27 | 10.55 | 0.26 | 23.08 | 3.03E-04 | 7.80E+12 | 4.29E+19 |
| 130.80 | 0.0040 | 12.17 | 10.31 | 0.29 | 22.77 | 1.76E-04 | 4.52E+12 | 2.49E+19 |
| 132.62 | 0.0046 | 12.03 | 10.76 | 0.28 | 23.07 | 1.99E-04 | 5.13E+12 | 2.82E+19 |
| 134.43 | 0.0022 | 11.78 | 10.47 | 0.28 | 22.53 | 9.77E-05 | 2.51E+12 | 1.38E+19 |
| 136.25 | 0.0030 | 11.70 | 9.74  | 0.30 | 21.73 | 1.38E-04 | 3.55E+12 | 1.95E+19 |
| 138.07 | 0.0034 | 11.03 | 10.14 | 0.28 | 21.44 | 1.59E-04 | 4.08E+12 | 2.25E+19 |
| 139.88 | 0.0016 | 11.27 | 9.97  | 0.28 | 21.53 | 7.43E-05 | 1.91E+12 | 1.05E+19 |
| 141.70 | 0.0016 | 11.27 | 10.64 | 0.22 | 22.13 | 7.23E-05 | 1.86E+12 | 1.02E+19 |
| 143.52 | 0.0016 | 11.51 | 10.15 | 0.28 | 21.94 | 7.29E-05 | 1.88E+12 | 1.03E+19 |
| 145.33 | 0.0014 | 11.25 | 10.28 | 0.26 | 21.79 | 6.43E-05 | 1.65E+12 | 9.10E+18 |
| 147.15 | 0.0006 | 11.22 | 10.26 | 0.22 | 21.69 | 2.77E-05 | 7.12E+11 | 3.92E+18 |
| 148.97 | 0.0020 | 11.24 | 10.28 | 0.22 | 21.74 | 9.20E-05 | 2.37E+12 | 1.30E+19 |
| 150.78 | 0.0012 | 11.01 | 10.41 | 0.22 | 21.64 | 5.55E-05 | 1.43E+12 | 7.85E+18 |
| 152.60 | 0.0020 | 11.00 | 10.01 | 0.25 | 21.26 | 9.41E-05 | 2.42E+12 | 1.33E+19 |
| 154.42 | 0.0008 | 10.60 | 10.82 | 0.21 | 21.63 | 3.70E-05 | 9.52E+11 | 5.24E+18 |
| 156.23 | 0.0012 | 11.15 | 9.84  | 0.28 | 21.28 | 5.64E-05 | 1.45E+12 | 7.99E+18 |
| 158.05 | 0.0008 | 10.40 | 10.01 | 0.21 | 20.61 | 3.88E-05 | 9.98E+11 | 5.50E+18 |
| 159.87 | 0.0008 | 10.80 | 9.99  | 0.27 | 21.06 | 3.80E-05 | 9.77E+11 | 5.38E+18 |
| 161.68 | 0.0008 | 10.91 | 9.63  | 0.28 | 20.83 | 3.84E-05 | 9.88E+11 | 5.44E+18 |
| 163.50 | 0.0022 | 10.53 | 9.63  | 0.23 | 20.40 | 1.08E-04 | 2.77E+12 | 1.53E+19 |
| 165.32 | 0.0012 | 10.53 | 9.95  | 0.26 | 20.74 | 5.79E-05 | 1.49E+12 | 8.19E+18 |
| 167.13 | 0.0004 | 10.85 | 9.66  | 0.29 | 20.81 | 1.92E-05 | 4.95E+11 | 2.72E+18 |
| 168.95 | 0.0012 | 10.34 | 10.62 | 0.18 | 21.14 | 5.68E-05 | 1.46E+12 | 8.04E+18 |
| 170.77 | 0.0014 | 10.64 | 9.62  | 0.24 | 20.50 | 6.83E-05 | 1.76E+12 | 9.67E+18 |
| 172.58 | 0.0004 | 11.00 | 9.74  | 0.23 | 20.97 | 1.91E-05 | 4.91E+11 | 2.70E+18 |
| 174.40 | 0.0008 | 11.13 | 9.26  | 0.28 | 20.67 | 3.87E-05 | 9.96E+11 | 5.48E+18 |
| 176.22 | 0.0014 | 10.85 | 9.26  | 0.22 | 20.34 | 6.88E-05 | 1.77E+12 | 9.75E+18 |
| 178.03 | 0.0012 | 11.15 | 9.88  | 0.23 | 21.26 | 5.64E-05 | 1.45E+12 | 7.99E+18 |
| 179.85 | 0.0016 | 11.04 | 9.40  | 0.26 | 20.69 | 7.73E-05 | 1.99E+12 | 1.10E+19 |
| 181.67 | 0.0006 | 11.20 | 9.21  | 0.26 | 20.67 | 2.90E-05 | 7.47E+11 | 4.11E+18 |

|        |        |       |       |      |       |          |          |          |
|--------|--------|-------|-------|------|-------|----------|----------|----------|
| 183.48 | 0.0006 | 10.84 | 9.28  | 0.23 | 20.35 | 2.95E-05 | 7.59E+11 | 4.18E+18 |
| 185.30 | 0.0006 | 10.65 | 9.82  | 0.20 | 20.67 | 2.90E-05 | 7.47E+11 | 4.11E+18 |
| 187.12 | 0.0008 | 10.72 | 10.02 | 0.20 | 20.94 | 3.82E-05 | 9.83E+11 | 5.41E+18 |
| 188.93 | 0.0014 | 10.71 | 9.93  | 0.22 | 20.85 | 6.71E-05 | 1.73E+12 | 9.51E+18 |
| 190.75 | 0.0010 | 10.86 | 8.89  | 0.28 | 20.03 | 4.99E-05 | 1.28E+12 | 7.07E+18 |
| 192.57 | 0.0012 | 10.90 | 9.69  | 0.22 | 20.82 | 5.76E-05 | 1.48E+12 | 8.16E+18 |
| 194.38 | 0.0006 | 10.92 | 9.46  | 0.25 | 20.63 | 2.91E-05 | 7.48E+11 | 4.12E+18 |
| 196.20 | 0.0002 | 10.08 | 10.00 | 0.18 | 20.26 | 9.87E-06 | 2.54E+11 | 1.40E+18 |
| 198.02 | 0.0004 | 10.52 | 9.96  | 0.21 | 20.69 | 1.93E-05 | 4.97E+11 | 2.74E+18 |
| 199.83 | 0.0006 | 10.43 | 10.03 | 0.26 | 20.72 | 2.90E-05 | 7.45E+11 | 4.10E+18 |
| 201.65 | 0.0012 | 10.45 | 9.59  | 0.23 | 20.27 | 5.92E-05 | 1.52E+12 | 8.38E+18 |
| 203.47 | 0.0010 | 10.43 | 9.72  | 0.25 | 20.39 | 4.90E-05 | 1.26E+12 | 6.94E+18 |
| 205.28 | 0.0012 | 10.33 | 10.15 | 0.23 | 20.71 | 5.79E-05 | 1.49E+12 | 8.21E+18 |
| 207.10 | 0.0014 | 10.18 | 9.58  | 0.26 | 20.01 | 7.00E-05 | 1.80E+12 | 9.91E+18 |
| 208.92 | 0.0008 | 10.30 | 9.77  | 0.26 | 20.33 | 3.93E-05 | 1.01E+12 | 5.57E+18 |
| 210.73 | 0.0012 | 10.00 | 10.05 | 0.25 | 20.29 | 5.91E-05 | 1.52E+12 | 8.37E+18 |
| 212.55 | 0.0012 | 9.91  | 10.01 | 0.21 | 20.13 | 5.96E-05 | 1.53E+12 | 8.44E+18 |
| 214.37 | 0.0002 | 10.06 | 9.70  | 0.23 | 20.00 | 1.00E-05 | 2.57E+11 | 1.42E+18 |
| 216.18 | 0.0006 | 9.99  | 9.92  | 0.22 | 20.14 | 2.98E-05 | 7.67E+11 | 4.22E+18 |
| 218.00 | 0.0004 | 10.40 | 9.62  | 0.29 | 20.31 | 1.97E-05 | 5.07E+11 | 2.79E+18 |

2014/3/12

Relative sensitivity factor of the day = 5.74E+16

| Depth (nm) He | C+     | C2+   | C3+   | ΣC   | He/ΣC | He/bin   | He conc<br>/cm-3 |          |
|---------------|--------|-------|-------|------|-------|----------|------------------|----------|
| 1.77          | 0.0030 | 18.37 | 16.21 | 0.72 | 35.29 | 8.50E-05 | 4.88E+12         | 2.76E+19 |
| 3.53          | 0.0026 | 18.03 | 14.63 | 0.43 | 33.08 | 7.86E-05 | 4.51E+12         | 2.55E+19 |
| 5.30          | 0.0042 | 18.29 | 14.03 | 0.33 | 32.65 | 1.29E-04 | 7.39E+12         | 4.18E+19 |
| 7.07          | 0.0046 | 20.26 | 14.77 | 0.32 | 35.35 | 1.30E-04 | 7.47E+12         | 4.23E+19 |
| 8.83          | 0.0050 | 20.83 | 14.94 | 0.31 | 36.08 | 1.39E-04 | 7.96E+12         | 4.50E+19 |
| 10.60         | 0.0054 | 20.68 | 15.25 | 0.32 | 36.25 | 1.49E-04 | 8.55E+12         | 4.84E+19 |
| 12.37         | 0.0056 | 19.86 | 15.17 | 0.34 | 35.37 | 1.58E-04 | 9.09E+12         | 5.15E+19 |
| 14.13         | 0.0048 | 20.02 | 15.50 | 0.36 | 35.88 | 1.34E-04 | 7.68E+12         | 4.35E+19 |
| 15.90         | 0.0084 | 21.19 | 14.86 | 0.29 | 36.34 | 2.31E-04 | 1.33E+13         | 7.51E+19 |
| 17.67         | 0.0092 | 20.64 | 14.65 | 0.27 | 35.56 | 2.59E-04 | 1.49E+13         | 8.41E+19 |
| 19.43         | 0.0086 | 21.42 | 15.26 | 0.32 | 37.00 | 2.32E-04 | 1.33E+13         | 7.55E+19 |
| 21.20         | 0.0084 | 21.06 | 14.94 | 0.30 | 36.30 | 2.31E-04 | 1.33E+13         | 7.52E+19 |
| 22.97         | 0.0104 | 20.93 | 15.66 | 0.33 | 36.92 | 2.82E-04 | 1.62E+13         | 9.15E+19 |
| 24.73         | 0.0160 | 20.18 | 15.55 | 0.33 | 36.06 | 4.44E-04 | 2.55E+13         | 1.44E+20 |
| 26.50         | 0.0160 | 21.13 | 15.10 | 0.28 | 36.51 | 4.38E-04 | 2.52E+13         | 1.42E+20 |
| 28.27         | 0.0128 | 20.45 | 15.37 | 0.31 | 36.13 | 3.54E-04 | 2.03E+13         | 1.15E+20 |
| 30.03         | 0.0162 | 20.35 | 15.42 | 0.30 | 36.08 | 4.49E-04 | 2.58E+13         | 1.46E+20 |
| 31.80         | 0.0178 | 21.05 | 15.58 | 0.29 | 36.92 | 4.82E-04 | 2.77E+13         | 1.57E+20 |
| 33.57         | 0.0222 | 20.64 | 15.11 | 0.29 | 36.04 | 6.16E-04 | 3.54E+13         | 2.00E+20 |
| 35.33         | 0.0216 | 20.59 | 14.94 | 0.24 | 35.78 | 6.04E-04 | 3.47E+13         | 1.96E+20 |
| 37.10         | 0.0278 | 20.83 | 15.00 | 0.26 | 36.09 | 7.70E-04 | 4.42E+13         | 2.50E+20 |
| 38.87         | 0.0312 | 20.60 | 15.13 | 0.25 | 35.97 | 8.67E-04 | 4.98E+13         | 2.82E+20 |
| 40.63         | 0.0310 | 20.30 | 15.35 | 0.29 | 35.95 | 8.62E-04 | 4.95E+13         | 2.80E+20 |
| 42.40         | 0.0318 | 20.13 | 14.69 | 0.24 | 35.07 | 9.07E-04 | 5.21E+13         | 2.95E+20 |
| 44.17         | 0.0332 | 19.69 | 14.08 | 0.25 | 34.03 | 9.76E-04 | 5.60E+13         | 3.17E+20 |
| 45.93         | 0.0454 | 19.07 | 14.30 | 0.28 | 33.65 | 1.35E-03 | 7.74E+13         | 4.38E+20 |
| 47.70         | 0.0550 | 19.98 | 14.40 | 0.28 | 34.66 | 1.59E-03 | 9.11E+13         | 5.16E+20 |
| 49.47         | 0.0562 | 20.80 | 14.91 | 0.31 | 36.02 | 1.56E-03 | 8.96E+13         | 5.07E+20 |
| 51.23         | 0.0602 | 20.36 | 14.28 | 0.27 | 34.91 | 1.72E-03 | 9.90E+13         | 5.60E+20 |
| 53.00         | 0.0700 | 20.53 | 13.96 | 0.26 | 34.75 | 2.01E-03 | 1.16E+14         | 6.55E+20 |
| 54.77         | 0.0762 | 20.27 | 14.72 | 0.27 | 35.25 | 2.16E-03 | 1.24E+14         | 7.02E+20 |
| 56.53         | 0.0778 | 21.47 | 14.39 | 0.22 | 36.09 | 2.16E-03 | 1.24E+14         | 7.01E+20 |
| 58.30         | 0.0834 | 19.68 | 14.35 | 0.27 | 34.30 | 2.43E-03 | 1.40E+14         | 7.90E+20 |
| 60.07         | 0.0924 | 21.56 | 14.89 | 0.26 | 36.70 | 2.52E-03 | 1.45E+14         | 8.18E+20 |
| 61.83         | 0.0978 | 21.82 | 14.56 | 0.20 | 36.58 | 2.67E-03 | 1.53E+14         | 8.69E+20 |
| 63.60         | 0.1158 | 20.77 | 14.81 | 0.25 | 35.83 | 3.23E-03 | 1.86E+14         | 1.05E+21 |
| 65.37         | 0.1202 | 20.93 | 14.69 | 0.24 | 35.85 | 3.35E-03 | 1.92E+14         | 1.09E+21 |
| 67.13         | 0.1398 | 20.80 | 14.81 | 0.27 | 35.87 | 3.90E-03 | 2.24E+14         | 1.27E+21 |
| 68.90         | 0.1602 | 19.94 | 15.47 | 0.33 | 35.74 | 4.48E-03 | 2.57E+14         | 1.46E+21 |
| 70.67         | 0.1464 | 21.89 | 13.90 | 0.20 | 35.99 | 4.07E-03 | 2.34E+14         | 1.32E+21 |
| 72.43         | 0.1854 | 21.25 | 15.20 | 0.26 | 36.70 | 5.05E-03 | 2.90E+14         | 1.64E+21 |
| 74.20         | 0.1840 | 20.97 | 14.37 | 0.23 | 35.57 | 5.17E-03 | 2.97E+14         | 1.68E+21 |
| 75.97         | 0.2090 | 20.70 | 14.75 | 0.27 | 35.72 | 5.85E-03 | 3.36E+14         | 1.90E+21 |
| 77.73         | 0.2060 | 19.72 | 14.05 | 0.28 | 34.05 | 6.05E-03 | 3.47E+14         | 1.97E+21 |
| 79.50         | 0.2204 | 20.06 | 14.63 | 0.25 | 34.94 | 6.31E-03 | 3.62E+14         | 2.05E+21 |
| 81.27         | 0.2198 | 21.29 | 14.88 | 0.25 | 36.41 | 6.04E-03 | 3.47E+14         | 1.96E+21 |
| 83.03         | 0.2508 | 20.52 | 14.66 | 0.25 | 35.43 | 7.08E-03 | 4.06E+14         | 2.30E+21 |
| 84.80         | 0.2454 | 21.15 | 14.69 | 0.26 | 36.10 | 6.80E-03 | 3.90E+14         | 2.21E+21 |

|        |        |       |       |      |       |          |          |          |
|--------|--------|-------|-------|------|-------|----------|----------|----------|
| 86.57  | 0.2418 | 19.49 | 14.51 | 0.26 | 34.26 | 7.06E-03 | 4.05E+14 | 2.29E+21 |
| 88.33  | 0.2522 | 19.09 | 14.48 | 0.26 | 33.83 | 7.45E-03 | 4.28E+14 | 2.42E+21 |
| 90.10  | 0.2410 | 19.67 | 14.72 | 0.28 | 34.66 | 6.95E-03 | 3.99E+14 | 2.26E+21 |
| 91.87  | 0.2234 | 20.43 | 13.55 | 0.22 | 34.20 | 6.53E-03 | 3.75E+14 | 2.12E+21 |
| 93.63  | 0.2318 | 19.64 | 14.28 | 0.26 | 34.19 | 6.78E-03 | 3.89E+14 | 2.20E+21 |
| 95.40  | 0.2136 | 20.28 | 14.18 | 0.25 | 34.71 | 6.15E-03 | 3.53E+14 | 2.00E+21 |
| 97.17  | 0.1930 | 19.55 | 14.27 | 0.27 | 34.09 | 5.66E-03 | 3.25E+14 | 1.84E+21 |
| 98.93  | 0.1656 | 20.85 | 13.64 | 0.22 | 34.71 | 4.77E-03 | 2.74E+14 | 1.55E+21 |
| 100.70 | 0.1450 | 19.57 | 13.32 | 0.25 | 33.14 | 4.38E-03 | 2.51E+14 | 1.42E+21 |
| 102.47 | 0.1336 | 19.56 | 13.94 | 0.29 | 33.79 | 3.95E-03 | 2.27E+14 | 1.28E+21 |
| 104.23 | 0.1104 | 19.93 | 13.39 | 0.25 | 33.58 | 3.29E-03 | 1.89E+14 | 1.07E+21 |
| 106.00 | 0.0888 | 20.60 | 13.81 | 0.25 | 34.66 | 2.56E-03 | 1.47E+14 | 8.32E+20 |
| 107.77 | 0.0794 | 18.88 | 13.40 | 0.23 | 32.52 | 2.44E-03 | 1.40E+14 | 7.93E+20 |
| 109.53 | 0.0644 | 18.79 | 13.63 | 0.28 | 32.70 | 1.97E-03 | 1.13E+14 | 6.40E+20 |
| 111.30 | 0.0524 | 19.39 | 14.53 | 0.24 | 34.16 | 1.53E-03 | 8.81E+13 | 4.98E+20 |
| 113.07 | 0.0378 | 19.75 | 13.53 | 0.21 | 33.49 | 1.13E-03 | 6.48E+13 | 3.67E+20 |
| 114.83 | 0.0336 | 18.93 | 13.23 | 0.25 | 32.41 | 1.04E-03 | 5.95E+13 | 3.37E+20 |
| 116.60 | 0.0230 | 17.95 | 13.39 | 0.23 | 31.57 | 7.28E-04 | 4.18E+13 | 2.37E+20 |
| 118.37 | 0.0190 | 19.34 | 13.46 | 0.20 | 33.00 | 5.76E-04 | 3.30E+13 | 1.87E+20 |
| 120.13 | 0.0138 | 18.92 | 14.02 | 0.24 | 33.19 | 4.16E-04 | 2.39E+13 | 1.35E+20 |
| 121.90 | 0.0100 | 20.07 | 13.39 | 0.20 | 33.66 | 2.97E-04 | 1.71E+13 | 9.65E+19 |
| 123.67 | 0.0102 | 18.09 | 13.50 | 0.27 | 31.86 | 3.20E-04 | 1.84E+13 | 1.04E+20 |
| 125.43 | 0.0074 | 16.94 | 13.12 | 0.28 | 30.34 | 2.44E-04 | 1.40E+13 | 7.93E+19 |
| 127.20 | 0.0058 | 17.81 | 12.55 | 0.20 | 30.56 | 1.90E-04 | 1.09E+13 | 6.17E+19 |
| 128.97 | 0.0046 | 17.15 | 12.38 | 0.23 | 29.76 | 1.55E-04 | 8.88E+12 | 5.02E+19 |
| 130.73 | 0.0030 | 18.56 | 13.01 | 0.21 | 31.78 | 9.44E-05 | 5.42E+12 | 3.07E+19 |
| 132.50 | 0.0016 | 18.26 | 12.49 | 0.22 | 30.96 | 5.17E-05 | 2.97E+12 | 1.68E+19 |
| 134.27 | 0.0022 | 18.83 | 12.64 | 0.20 | 31.67 | 6.95E-05 | 3.99E+12 | 2.26E+19 |
| 136.03 | 0.0016 | 17.92 | 11.92 | 0.18 | 30.03 | 5.33E-05 | 3.06E+12 | 1.73E+19 |
| 137.80 | 0.0010 | 17.43 | 12.42 | 0.23 | 30.09 | 3.32E-05 | 1.91E+12 | 1.08E+19 |
| 139.57 | 0.0008 | 17.17 | 12.28 | 0.21 | 29.66 | 2.70E-05 | 1.55E+12 | 8.76E+18 |
| 141.33 | 0.0012 | 18.33 | 12.60 | 0.20 | 31.12 | 3.86E-05 | 2.21E+12 | 1.25E+19 |
| 143.10 | 0.0012 | 18.17 | 11.79 | 0.16 | 30.12 | 3.98E-05 | 2.29E+12 | 1.29E+19 |
| 144.87 | 0.0008 | 17.46 | 11.78 | 0.20 | 29.45 | 2.72E-05 | 1.56E+12 | 8.83E+18 |
| 146.63 | 0.0006 | 18.14 | 11.67 | 0.16 | 29.97 | 2.00E-05 | 1.15E+12 | 6.50E+18 |
| 148.40 | 0.0010 | 16.04 | 11.34 | 0.20 | 27.58 | 3.63E-05 | 2.08E+12 | 1.18E+19 |
| 150.17 | 0.0008 | 16.24 | 11.82 | 0.23 | 28.28 | 2.83E-05 | 1.62E+12 | 9.19E+18 |
| 151.93 | 0.0006 | 16.94 | 12.03 | 0.22 | 29.19 | 2.06E-05 | 1.18E+12 | 6.68E+18 |
| 153.70 | 0.0010 | 18.06 | 12.25 | 0.19 | 30.50 | 3.28E-05 | 1.88E+12 | 1.07E+19 |
| 155.47 | 0.0004 | 16.69 | 12.24 | 0.22 | 29.14 | 1.37E-05 | 7.88E+11 | 4.46E+18 |
| 157.23 | 0.0008 | 16.69 | 12.69 | 0.21 | 29.60 | 2.70E-05 | 1.55E+12 | 8.78E+18 |
| 159.00 | 0.0006 | 15.84 | 12.10 | 0.23 | 28.17 | 2.13E-05 | 1.22E+12 | 6.92E+18 |
| 160.77 | 0.0014 | 17.51 | 11.84 | 0.17 | 29.52 | 4.74E-05 | 2.72E+12 | 1.54E+19 |
| 162.53 | 0.0004 | 15.70 | 12.30 | 0.27 | 28.28 | 1.41E-05 | 8.12E+11 | 4.60E+18 |
| 164.30 | 0.0014 | 17.09 | 12.33 | 0.21 | 29.62 | 4.73E-05 | 2.71E+12 | 1.54E+19 |
| 166.07 | 0.0002 | 16.38 | 12.10 | 0.23 | 28.71 | 6.97E-06 | 4.00E+11 | 2.26E+18 |
| 167.83 | 0.0002 | 16.01 | 12.26 | 0.25 | 28.52 | 7.01E-06 | 4.03E+11 | 2.28E+18 |
| 169.60 | 0.0008 | 16.68 | 11.87 | 0.19 | 28.75 | 2.78E-05 | 1.60E+12 | 9.04E+18 |
| 171.37 | 0.0008 | 15.70 | 11.73 | 0.21 | 27.63 | 2.90E-05 | 1.66E+12 | 9.41E+18 |
| 173.13 | 0.0008 | 15.95 | 11.31 | 0.19 | 27.45 | 2.91E-05 | 1.67E+12 | 9.47E+18 |
| 174.90 | 0.0004 | 16.81 | 11.65 | 0.20 | 28.66 | 1.40E-05 | 8.01E+11 | 4.53E+18 |
| 176.67 | 0.0006 | 16.28 | 11.43 | 0.21 | 27.92 | 2.15E-05 | 1.23E+12 | 6.98E+18 |

|        |        |       |       |      |       |          |          |          |
|--------|--------|-------|-------|------|-------|----------|----------|----------|
| 178.43 | 0.0000 | 17.90 | 11.77 | 0.18 | 29.85 | 0.00E+00 | 0.00E+00 | 0.00E+00 |
| 180.20 | 0.0004 | 16.60 | 11.75 | 0.24 | 28.59 | 1.40E-05 | 8.03E+11 | 4.55E+18 |
| 181.97 | 0.0004 | 15.97 | 11.68 | 0.25 | 27.90 | 1.43E-05 | 8.23E+11 | 4.66E+18 |
| 183.73 | 0.0000 | 17.87 | 11.23 | 0.20 | 29.30 | 0.00E+00 | 0.00E+00 | 0.00E+00 |
| 185.50 | 0.0002 | 16.93 | 11.80 | 0.24 | 28.97 | 6.90E-06 | 3.96E+11 | 2.24E+18 |
| 187.27 | 0.0008 | 17.06 | 11.97 | 0.23 | 29.26 | 2.73E-05 | 1.57E+12 | 8.88E+18 |
| 189.03 | 0.0012 | 17.09 | 11.46 | 0.21 | 28.76 | 4.17E-05 | 2.40E+12 | 1.36E+19 |
| 190.80 | 0.0002 | 16.43 | 11.27 | 0.20 | 27.91 | 7.17E-06 | 4.11E+11 | 2.33E+18 |
| 192.57 | 0.0004 | 17.04 | 11.49 | 0.21 | 28.74 | 1.39E-05 | 7.99E+11 | 4.52E+18 |
| 194.33 | 0.0008 | 16.58 | 11.72 | 0.25 | 28.55 | 2.80E-05 | 1.61E+12 | 9.11E+18 |
| 196.10 | 0.0002 | 17.49 | 11.68 | 0.20 | 29.38 | 6.81E-06 | 3.91E+11 | 2.21E+18 |
| 197.87 | 0.0002 | 16.91 | 11.10 | 0.19 | 28.20 | 7.09E-06 | 4.07E+11 | 2.30E+18 |
| 199.63 | 0.0006 | 16.05 | 11.27 | 0.23 | 27.55 | 2.18E-05 | 1.25E+12 | 7.08E+18 |
| 201.40 | 0.0002 | 17.61 | 11.71 | 0.17 | 29.50 | 6.78E-06 | 3.89E+11 | 2.20E+18 |
| 203.17 | 0.0006 | 16.34 | 12.13 | 0.26 | 28.73 | 2.09E-05 | 1.20E+12 | 6.79E+18 |
| 204.93 | 0.0006 | 16.61 | 12.28 | 0.25 | 29.14 | 2.06E-05 | 1.18E+12 | 6.69E+18 |
| 206.70 | 0.0008 | 17.84 | 11.84 | 0.19 | 29.87 | 2.68E-05 | 1.54E+12 | 8.70E+18 |
| 208.47 | 0.0000 | 16.43 | 12.33 | 0.27 | 29.03 | 0.00E+00 | 0.00E+00 | 0.00E+00 |
| 210.23 | 0.0008 | 18.12 | 12.08 | 0.19 | 30.39 | 2.63E-05 | 1.51E+12 | 8.56E+18 |
| 212.00 | 0.0004 | 17.71 | 12.22 | 0.19 | 30.12 | 1.33E-05 | 7.62E+11 | 4.32E+18 |

2014/3/14

Relative sensitivity factor of the day = **3.35E+16**

| Depth (nm) | He     | C+    | C2+   | C3+  | $\Sigma C$ | He/ $\Sigma C$ | He/bin   | He conc<br>/cm-3 |
|------------|--------|-------|-------|------|------------|----------------|----------|------------------|
| 1.44       | 0.0040 | 16.35 | 13.10 | 0.88 | 30.34      | 1.32E-04       | 4.42E+12 | 3.08E+19         |
| 2.87       | 0.0030 | 16.66 | 10.02 | 0.36 | 27.04      | 1.11E-04       | 3.72E+12 | 2.59E+19         |
| 4.31       | 0.0040 | 16.50 | 11.06 | 0.42 | 27.99      | 1.43E-04       | 4.79E+12 | 3.34E+19         |
| 5.74       | 0.0050 | 16.63 | 11.36 | 0.44 | 28.44      | 1.76E-04       | 5.90E+12 | 4.11E+19         |
| 7.18       | 0.0058 | 16.56 | 11.75 | 0.41 | 28.73      | 2.02E-04       | 6.77E+12 | 4.72E+19         |
| 8.61       | 0.0036 | 16.82 | 12.07 | 0.41 | 29.29      | 1.23E-04       | 4.12E+12 | 2.87E+19         |
| 10.05      | 0.0060 | 17.79 | 11.88 | 0.41 | 30.08      | 1.99E-04       | 6.69E+12 | 4.66E+19         |
| 11.49      | 0.0042 | 17.91 | 12.06 | 0.35 | 30.32      | 1.39E-04       | 4.65E+12 | 3.24E+19         |
| 12.92      | 0.0082 | 17.39 | 12.62 | 0.39 | 30.41      | 2.70E-04       | 9.05E+12 | 6.30E+19         |
| 14.36      | 0.0076 | 17.79 | 12.48 | 0.38 | 30.65      | 2.48E-04       | 8.32E+12 | 5.79E+19         |
| 15.79      | 0.0086 | 18.95 | 12.35 | 0.34 | 31.64      | 2.72E-04       | 9.12E+12 | 6.35E+19         |
| 17.23      | 0.0092 | 17.80 | 12.39 | 0.41 | 30.60      | 3.01E-04       | 1.01E+13 | 7.03E+19         |
| 18.66      | 0.0082 | 18.39 | 12.38 | 0.33 | 31.10      | 2.64E-04       | 8.85E+12 | 6.16E+19         |
| 20.10      | 0.0108 | 18.12 | 12.50 | 0.36 | 30.98      | 3.49E-04       | 1.17E+13 | 8.15E+19         |
| 21.54      | 0.0126 | 18.20 | 12.56 | 0.37 | 31.14      | 4.05E-04       | 1.36E+13 | 9.45E+19         |
| 22.97      | 0.0122 | 18.21 | 12.37 | 0.38 | 30.96      | 3.94E-04       | 1.32E+13 | 9.21E+19         |
| 24.41      | 0.0138 | 19.36 | 12.67 | 0.31 | 32.35      | 4.27E-04       | 1.43E+13 | 9.97E+19         |
| 25.84      | 0.0120 | 18.73 | 12.59 | 0.35 | 31.67      | 3.79E-04       | 1.27E+13 | 8.85E+19         |
| 27.28      | 0.0164 | 17.64 | 12.47 | 0.41 | 30.53      | 5.37E-04       | 1.80E+13 | 1.26E+20         |
| 28.71      | 0.0176 | 18.35 | 12.31 | 0.34 | 30.99      | 5.68E-04       | 1.90E+13 | 1.33E+20         |
| 30.15      | 0.0178 | 18.34 | 12.55 | 0.37 | 31.26      | 5.69E-04       | 1.91E+13 | 1.33E+20         |
| 31.59      | 0.0190 | 17.93 | 12.59 | 0.39 | 30.91      | 6.15E-04       | 2.06E+13 | 1.44E+20         |
| 33.02      | 0.0224 | 17.88 | 12.49 | 0.39 | 30.76      | 7.28E-04       | 2.44E+13 | 1.70E+20         |
| 34.46      | 0.0226 | 17.63 | 12.73 | 0.37 | 30.73      | 7.36E-04       | 2.47E+13 | 1.72E+20         |
| 35.89      | 0.0286 | 17.89 | 13.10 | 0.40 | 31.39      | 9.11E-04       | 3.06E+13 | 2.13E+20         |
| 37.33      | 0.0282 | 17.91 | 12.57 | 0.38 | 30.87      | 9.14E-04       | 3.06E+13 | 2.13E+20         |
| 38.76      | 0.0286 | 18.80 | 12.27 | 0.37 | 31.43      | 9.10E-04       | 3.05E+13 | 2.13E+20         |
| 40.20      | 0.0392 | 18.41 | 12.35 | 0.33 | 31.09      | 1.26E-03       | 4.23E+13 | 2.95E+20         |
| 41.64      | 0.0376 | 18.25 | 12.26 | 0.37 | 30.88      | 1.22E-03       | 4.08E+13 | 2.84E+20         |
| 43.07      | 0.0468 | 17.78 | 12.81 | 0.44 | 31.03      | 1.51E-03       | 5.06E+13 | 3.52E+20         |
| 44.51      | 0.0436 | 18.66 | 12.12 | 0.29 | 31.07      | 1.40E-03       | 4.71E+13 | 3.28E+20         |
| 45.94      | 0.0508 | 18.25 | 12.65 | 0.37 | 31.26      | 1.63E-03       | 5.45E+13 | 3.80E+20         |
| 47.38      | 0.0530 | 17.94 | 12.39 | 0.39 | 30.72      | 1.73E-03       | 5.79E+13 | 4.03E+20         |
| 48.81      | 0.0586 | 18.61 | 12.16 | 0.32 | 31.08      | 1.89E-03       | 6.32E+13 | 4.41E+20         |
| 50.25      | 0.0582 | 18.13 | 12.33 | 0.38 | 30.84      | 1.89E-03       | 6.33E+13 | 4.41E+20         |
| 51.69      | 0.0562 | 18.56 | 11.63 | 0.29 | 30.48      | 1.84E-03       | 6.19E+13 | 4.31E+20         |
| 53.12      | 0.0760 | 18.41 | 11.95 | 0.29 | 30.65      | 2.48E-03       | 8.32E+13 | 5.79E+20         |
| 54.56      | 0.0732 | 18.74 | 12.04 | 0.29 | 31.07      | 2.36E-03       | 7.90E+13 | 5.50E+20         |
| 55.99      | 0.0720 | 18.58 | 11.60 | 0.29 | 30.47      | 2.36E-03       | 7.93E+13 | 5.52E+20         |
| 57.43      | 0.0938 | 18.10 | 12.21 | 0.38 | 30.68      | 3.06E-03       | 1.03E+14 | 7.14E+20         |
| 58.86      | 0.0850 | 18.38 | 12.12 | 0.35 | 30.85      | 2.76E-03       | 9.24E+13 | 6.44E+20         |
| 60.30      | 0.0978 | 18.39 | 12.31 | 0.34 | 31.04      | 3.15E-03       | 1.06E+14 | 7.36E+20         |
| 61.74      | 0.1140 | 18.79 | 12.30 | 0.34 | 31.43      | 3.63E-03       | 1.22E+14 | 8.48E+20         |
| 63.17      | 0.1226 | 18.17 | 12.12 | 0.33 | 30.62      | 4.00E-03       | 1.34E+14 | 9.35E+20         |
| 64.61      | 0.1256 | 18.37 | 12.32 | 0.34 | 31.03      | 4.05E-03       | 1.36E+14 | 9.46E+20         |
| 66.04      | 0.1476 | 17.14 | 12.98 | 0.39 | 30.51      | 4.84E-03       | 1.62E+14 | 1.13E+21         |
| 67.48      | 0.1562 | 17.31 | 12.63 | 0.36 | 30.30      | 5.15E-03       | 1.73E+14 | 1.20E+21         |
| 68.91      | 0.1522 | 18.20 | 12.22 | 0.32 | 30.74      | 4.95E-03       | 1.66E+14 | 1.16E+21         |

|        |        |       |       |      |       |          |          |          |
|--------|--------|-------|-------|------|-------|----------|----------|----------|
| 70.35  | 0.1676 | 16.81 | 12.43 | 0.35 | 29.59 | 5.66E-03 | 1.90E+14 | 1.32E+21 |
| 71.79  | 0.1558 | 18.47 | 12.03 | 0.32 | 30.82 | 5.05E-03 | 1.70E+14 | 1.18E+21 |
| 73.22  | 0.1854 | 17.80 | 12.40 | 0.33 | 30.53 | 6.07E-03 | 2.04E+14 | 1.42E+21 |
| 74.66  | 0.2082 | 17.67 | 12.37 | 0.34 | 30.38 | 6.85E-03 | 2.30E+14 | 1.60E+21 |
| 76.09  | 0.2184 | 17.04 | 12.13 | 0.39 | 29.55 | 7.39E-03 | 2.48E+14 | 1.73E+21 |
| 77.53  | 0.2228 | 17.10 | 12.39 | 0.36 | 29.85 | 7.46E-03 | 2.50E+14 | 1.74E+21 |
| 78.96  | 0.2252 | 17.90 | 12.41 | 0.33 | 30.64 | 7.35E-03 | 2.47E+14 | 1.72E+21 |
| 80.40  | 0.2182 | 18.04 | 12.22 | 0.30 | 30.56 | 7.14E-03 | 2.40E+14 | 1.67E+21 |
| 81.84  | 0.2580 | 17.52 | 12.59 | 0.35 | 30.47 | 8.47E-03 | 2.84E+14 | 1.98E+21 |
| 83.27  | 0.2582 | 17.04 | 12.57 | 0.34 | 29.95 | 8.62E-03 | 2.89E+14 | 2.01E+21 |
| 84.71  | 0.2724 | 17.76 | 12.74 | 0.37 | 30.87 | 8.83E-03 | 2.96E+14 | 2.06E+21 |
| 86.14  | 0.2634 | 18.21 | 12.16 | 0.29 | 30.66 | 8.59E-03 | 2.88E+14 | 2.01E+21 |
| 87.58  | 0.2744 | 17.36 | 12.44 | 0.36 | 30.16 | 9.10E-03 | 3.05E+14 | 2.13E+21 |
| 89.01  | 0.2842 | 17.85 | 12.68 | 0.39 | 30.92 | 9.19E-03 | 3.08E+14 | 2.15E+21 |
| 90.45  | 0.2674 | 17.92 | 12.35 | 0.33 | 30.60 | 8.74E-03 | 2.93E+14 | 2.04E+21 |
| 91.89  | 0.2820 | 18.53 | 12.54 | 0.34 | 31.41 | 8.98E-03 | 3.01E+14 | 2.10E+21 |
| 93.32  | 0.2558 | 18.35 | 12.13 | 0.27 | 30.75 | 8.32E-03 | 2.79E+14 | 1.94E+21 |
| 94.76  | 0.2772 | 17.08 | 12.37 | 0.37 | 29.83 | 9.29E-03 | 3.12E+14 | 2.17E+21 |
| 96.19  | 0.2920 | 18.06 | 12.84 | 0.39 | 31.30 | 9.33E-03 | 3.13E+14 | 2.18E+21 |
| 97.63  | 0.2544 | 18.78 | 12.31 | 0.28 | 31.37 | 8.11E-03 | 2.72E+14 | 1.90E+21 |
| 99.06  | 0.2472 | 18.31 | 12.24 | 0.32 | 30.86 | 8.01E-03 | 2.69E+14 | 1.87E+21 |
| 100.50 | 0.2292 | 17.40 | 12.43 | 0.40 | 30.23 | 7.58E-03 | 2.54E+14 | 1.77E+21 |
| 101.94 | 0.2064 | 17.56 | 12.09 | 0.36 | 30.01 | 6.88E-03 | 2.31E+14 | 1.61E+21 |
| 103.37 | 0.2038 | 18.51 | 11.96 | 0.32 | 30.79 | 6.62E-03 | 2.22E+14 | 1.55E+21 |
| 104.81 | 0.1630 | 18.89 | 11.21 | 0.24 | 30.35 | 5.37E-03 | 1.80E+14 | 1.26E+21 |
| 106.24 | 0.1650 | 17.57 | 11.78 | 0.36 | 29.71 | 5.55E-03 | 1.86E+14 | 1.30E+21 |
| 107.68 | 0.1494 | 17.75 | 12.11 | 0.34 | 30.20 | 4.95E-03 | 1.66E+14 | 1.16E+21 |
| 109.11 | 0.1202 | 17.87 | 11.86 | 0.35 | 30.07 | 4.00E-03 | 1.34E+14 | 9.34E+20 |
| 110.55 | 0.0982 | 18.91 | 11.36 | 0.27 | 30.54 | 3.22E-03 | 1.08E+14 | 7.51E+20 |
| 111.99 | 0.1022 | 17.90 | 11.59 | 0.34 | 29.83 | 3.43E-03 | 1.15E+14 | 8.01E+20 |
| 113.42 | 0.0856 | 16.99 | 11.52 | 0.34 | 28.85 | 2.97E-03 | 9.95E+13 | 6.93E+20 |
| 114.86 | 0.0682 | 18.08 | 11.26 | 0.26 | 29.59 | 2.30E-03 | 7.73E+13 | 5.39E+20 |
| 116.29 | 0.0610 | 17.63 | 11.68 | 0.35 | 29.66 | 2.06E-03 | 6.90E+13 | 4.81E+20 |
| 117.73 | 0.0472 | 18.06 | 11.33 | 0.28 | 29.67 | 1.59E-03 | 5.34E+13 | 3.72E+20 |
| 119.16 | 0.0376 | 17.31 | 11.82 | 0.34 | 29.47 | 1.28E-03 | 4.28E+13 | 2.98E+20 |
| 120.60 | 0.0334 | 17.50 | 11.62 | 0.32 | 29.44 | 1.13E-03 | 3.81E+13 | 2.65E+20 |
| 122.04 | 0.0286 | 16.97 | 11.52 | 0.30 | 28.79 | 9.93E-04 | 3.33E+13 | 2.32E+20 |
| 123.47 | 0.0198 | 17.59 | 11.43 | 0.30 | 29.31 | 6.75E-04 | 2.27E+13 | 1.58E+20 |
| 124.91 | 0.0182 | 16.65 | 11.51 | 0.31 | 28.47 | 6.39E-04 | 2.14E+13 | 1.49E+20 |
| 126.34 | 0.0098 | 16.78 | 11.24 | 0.29 | 28.31 | 3.46E-04 | 1.16E+13 | 8.09E+19 |
| 127.78 | 0.0096 | 17.69 | 10.91 | 0.27 | 28.87 | 3.33E-04 | 1.12E+13 | 7.77E+19 |
| 129.21 | 0.0092 | 16.72 | 11.10 | 0.30 | 28.13 | 3.27E-04 | 1.10E+13 | 7.64E+19 |
| 130.65 | 0.0060 | 18.27 | 10.65 | 0.20 | 29.11 | 2.06E-04 | 6.91E+12 | 4.82E+19 |
| 132.09 | 0.0072 | 15.86 | 11.16 | 0.33 | 27.35 | 2.63E-04 | 8.83E+12 | 6.15E+19 |
| 133.52 | 0.0056 | 16.16 | 10.98 | 0.33 | 27.47 | 2.04E-04 | 6.84E+12 | 4.76E+19 |
| 134.96 | 0.0032 | 16.23 | 10.98 | 0.28 | 27.50 | 1.16E-04 | 3.90E+12 | 2.72E+19 |
| 136.39 | 0.0038 | 16.44 | 10.68 | 0.27 | 27.39 | 1.39E-04 | 4.65E+12 | 3.24E+19 |
| 137.83 | 0.0026 | 15.33 | 11.14 | 0.33 | 26.80 | 9.70E-05 | 3.25E+12 | 2.27E+19 |
| 139.26 | 0.0022 | 16.62 | 10.71 | 0.25 | 27.59 | 7.97E-05 | 2.68E+12 | 1.86E+19 |
| 140.70 | 0.0026 | 15.62 | 10.83 | 0.30 | 26.75 | 9.72E-05 | 3.26E+12 | 2.27E+19 |
| 142.14 | 0.0020 | 15.61 | 10.49 | 0.28 | 26.37 | 7.58E-05 | 2.54E+12 | 1.77E+19 |
| 143.57 | 0.0024 | 15.73 | 10.45 | 0.25 | 26.43 | 9.08E-05 | 3.05E+12 | 2.12E+19 |



|        |        |       |       |      |       |          |          |          |
|--------|--------|-------|-------|------|-------|----------|----------|----------|
| 145.01 | 0.0012 | 15.78 | 10.76 | 0.31 | 26.85 | 4.47E-05 | 1.50E+12 | 1.04E+19 |
| 146.44 | 0.0022 | 16.06 | 10.54 | 0.28 | 26.89 | 8.18E-05 | 2.75E+12 | 1.91E+19 |
| 147.88 | 0.0012 | 15.38 | 10.57 | 0.32 | 26.27 | 4.57E-05 | 1.53E+12 | 1.07E+19 |
| 149.31 | 0.0004 | 15.77 | 10.07 | 0.22 | 26.06 | 1.53E-05 | 5.15E+11 | 3.59E+18 |
| 150.75 | 0.0010 | 16.02 | 10.15 | 0.23 | 26.40 | 3.79E-05 | 1.27E+12 | 8.85E+18 |
| 152.19 | 0.0014 | 14.94 | 10.49 | 0.32 | 25.75 | 5.44E-05 | 1.82E+12 | 1.27E+19 |
| 153.62 | 0.0012 | 14.70 | 10.37 | 0.30 | 25.37 | 4.73E-05 | 1.59E+12 | 1.11E+19 |
| 155.06 | 0.0006 | 15.07 | 10.48 | 0.32 | 25.87 | 2.32E-05 | 7.78E+11 | 5.42E+18 |
| 156.49 | 0.0002 | 15.52 | 10.10 | 0.26 | 25.87 | 7.73E-06 | 2.59E+11 | 1.81E+18 |
| 157.93 | 0.0008 | 14.28 | 10.55 | 0.38 | 25.21 | 3.17E-05 | 1.06E+12 | 7.41E+18 |
| 159.36 | 0.0006 | 14.81 | 10.28 | 0.30 | 25.38 | 2.36E-05 | 7.93E+11 | 5.52E+18 |
| 160.80 | 0.0008 | 15.57 | 9.76  | 0.27 | 25.60 | 3.13E-05 | 1.05E+12 | 7.30E+18 |
| 162.24 | 0.0008 | 14.77 | 10.09 | 0.31 | 25.17 | 3.18E-05 | 1.07E+12 | 7.43E+18 |
| 163.67 | 0.0004 | 15.02 | 9.80  | 0.25 | 25.07 | 1.60E-05 | 5.35E+11 | 3.73E+18 |
| 165.11 | 0.0004 | 14.37 | 10.27 | 0.32 | 24.96 | 1.60E-05 | 5.38E+11 | 3.74E+18 |
| 166.54 | 0.0010 | 14.84 | 10.32 | 0.32 | 25.48 | 3.92E-05 | 1.32E+12 | 9.17E+18 |
| 167.98 | 0.0008 | 14.72 | 10.21 | 0.32 | 25.25 | 3.17E-05 | 1.06E+12 | 7.40E+18 |
| 169.41 | 0.0006 | 14.24 | 9.94  | 0.30 | 24.48 | 2.45E-05 | 8.22E+11 | 5.73E+18 |
| 170.85 | 0.0010 | 15.20 | 9.76  | 0.25 | 25.21 | 3.97E-05 | 1.33E+12 | 9.27E+18 |
| 172.29 | 0.0010 | 14.01 | 9.92  | 0.28 | 24.21 | 4.13E-05 | 1.39E+12 | 9.65E+18 |
| 173.72 | 0.0000 | 15.06 | 9.88  | 0.25 | 25.19 | 0.00E+00 | 0.00E+00 | 0.00E+00 |
| 175.16 | 0.0008 | 15.11 | 9.57  | 0.25 | 24.93 | 3.21E-05 | 1.08E+12 | 7.50E+18 |
| 176.59 | 0.0006 | 14.61 | 9.92  | 0.28 | 24.81 | 2.42E-05 | 8.11E+11 | 5.65E+18 |
| 178.03 | 0.0004 | 14.29 | 9.99  | 0.30 | 24.59 | 1.63E-05 | 5.46E+11 | 3.80E+18 |
| 179.46 | 0.0004 | 14.21 | 10.08 | 0.30 | 24.58 | 1.63E-05 | 5.46E+11 | 3.80E+18 |
| 180.90 | 0.0000 | 14.70 | 9.70  | 0.26 | 24.66 | 0.00E+00 | 0.00E+00 | 0.00E+00 |
| 182.34 | 0.0004 | 14.24 | 9.86  | 0.34 | 24.43 | 1.64E-05 | 5.49E+11 | 3.83E+18 |
| 183.77 | 0.0004 | 14.75 | 9.74  | 0.29 | 24.78 | 1.61E-05 | 5.42E+11 | 3.77E+18 |
| 185.21 | 0.0004 | 15.06 | 9.80  | 0.24 | 25.10 | 1.59E-05 | 5.35E+11 | 3.72E+18 |
| 186.64 | 0.0012 | 15.21 | 9.85  | 0.26 | 25.31 | 4.74E-05 | 1.59E+12 | 1.11E+19 |
| 188.08 | 0.0008 | 14.62 | 9.96  | 0.26 | 24.84 | 3.22E-05 | 1.08E+12 | 7.53E+18 |
| 189.51 | 0.0006 | 13.90 | 10.11 | 0.33 | 24.35 | 2.46E-05 | 8.27E+11 | 5.76E+18 |
| 190.95 | 0.0012 | 14.65 | 10.29 | 0.27 | 25.21 | 4.76E-05 | 1.60E+12 | 1.11E+19 |
| 192.39 | 0.0006 | 14.04 | 10.33 | 0.29 | 24.66 | 2.43E-05 | 8.16E+11 | 5.69E+18 |
| 193.82 | 0.0010 | 14.22 | 9.79  | 0.26 | 24.28 | 4.12E-05 | 1.38E+12 | 9.62E+18 |
| 195.26 | 0.0004 | 13.97 | 10.07 | 0.29 | 24.34 | 1.64E-05 | 5.51E+11 | 3.84E+18 |
| 196.69 | 0.0004 | 14.85 | 10.04 | 0.23 | 25.13 | 1.59E-05 | 5.34E+11 | 3.72E+18 |
| 198.13 | 0.0000 | 14.18 | 9.83  | 0.26 | 24.27 | 0.00E+00 | 0.00E+00 | 0.00E+00 |
| 199.56 | 0.0008 | 13.79 | 9.96  | 0.28 | 24.04 | 3.33E-05 | 1.12E+12 | 7.78E+18 |
| 201.00 | 0.0004 | 14.36 | 9.62  | 0.25 | 24.24 | 1.65E-05 | 5.54E+11 | 3.86E+18 |
